# Supplementary material
Source: Springer Nature journal article supplement (https://www.springermedizin.de/resource/supplementary/12865_2009_325_MOESM9_ESM.pdf/9427762)
Supplement: MOESM9 [file 9427762]

**Step 1: Significant Differential Expression Filtering**

Experiment 1 Experiment 2  
45,101 45,101

**A**

**1a**  
Change p-value must be  $\leq .002$  OR  $\geq .998$

↓ ↓  
**Is expression above detection threshold?** → **No**

**1b**  
Differential expression must be  $> 4$ -fold OR  $> 2$ -fold change

↓ **Yes** ↓  
**Is the transcript differentially expressed?** → **No**

↓ **Yes** ↓  
4-fold: 2,469 4-fold: 2,642  
2-fold: 7,982 2-fold: 8,076

**B**

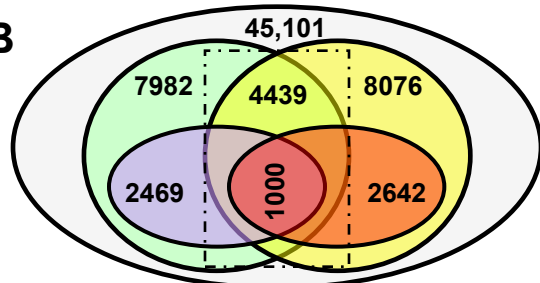

**Step 2: Consistency Filtering**

**2a**  
Each probe set must have passed Step 1 in both expts

↓ ↓  
**Significant in both experiments?** → **No**  
↓ **Yes** ↓

**2b**  
Euclidean distance between replicate profiles is  $\leq 1.4$

4-fold: 1,000  
2-fold: 4,439  
↓  
**Consistent expression levels?** → **No**  
**Yes** ↓

**2c**  
Pearson's Correlation between replicate profiles is  $\geq .76$

**Consistent profile patterns?** → **No**  
**Yes** ↓

4-fold: 395  
2-fold: 2,142

**C**

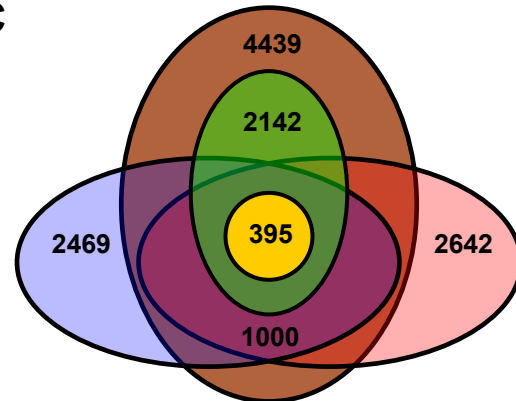

**Step 3: Cluster Analysis**

**3a**  
Figure of Merit Analysis

↓  
**Which clustering algorithm and how many clusters are optimal?**

**3b**  
Consensus Clustering

↓  
**Do the expression profiles cluster consistently in both experiments?** → **No**  
↓ **Yes** ↓

4-fold: 361; 47 clusters  
2-fold: 2,025; 140 clusters
